# Supplementary material
Source: PubMed Central journal article supplement (PMC3646464)
Supplement: supp_M035410_jlr.M035410-1.pdf [file supp_M035410_jlr.M035410-1.pdf]

# Structural and dynamic insight into substrate binding and catalysis of Human Lipocalin Prostaglandin D Synthase

Lim et al

**Figure S1**

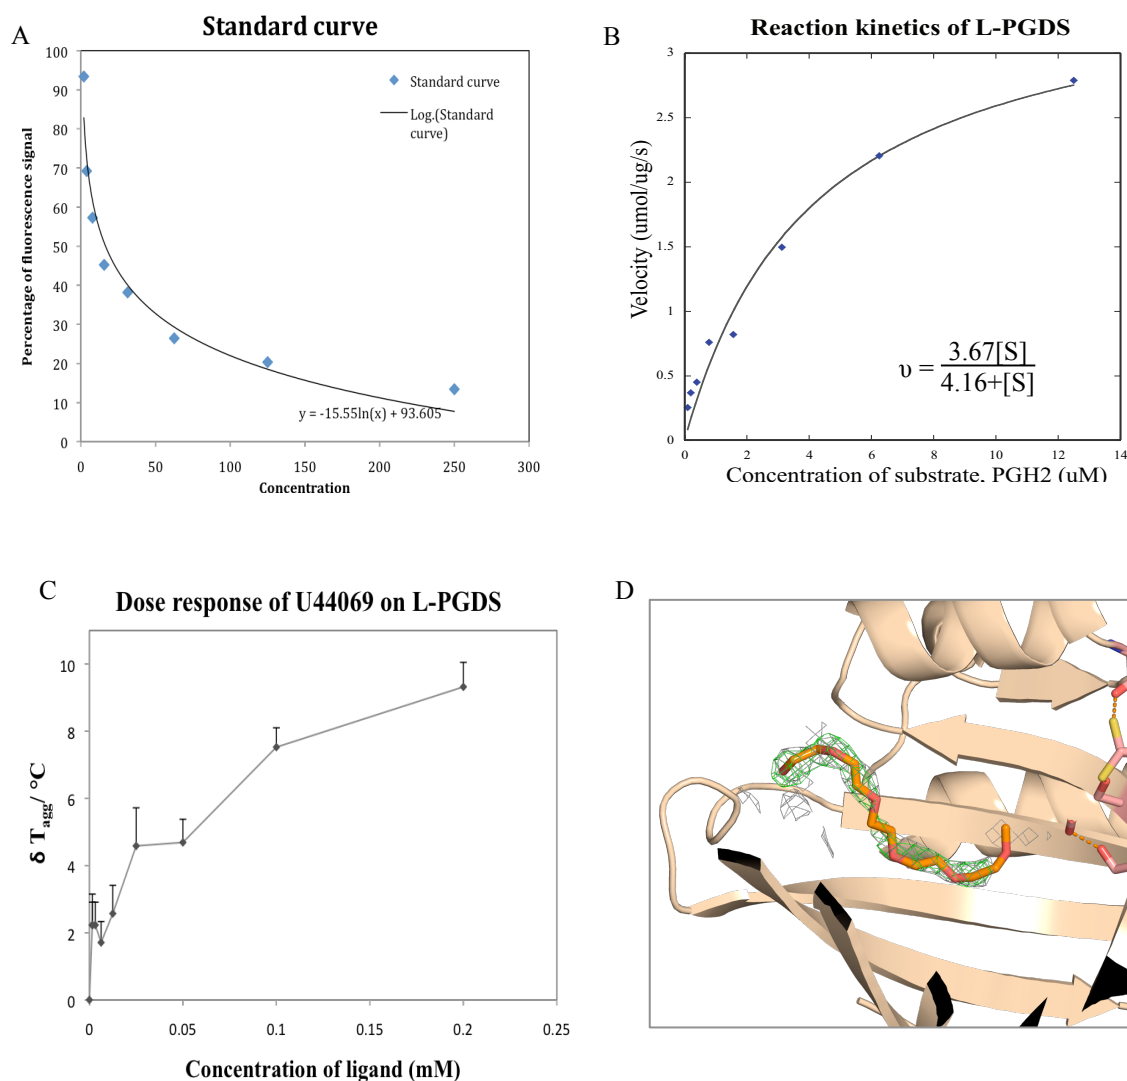

(A&B) PGD2-MOX ELISA enzymatic assay from Cayman chemicals: panel (A) is the reaction kinetics experimentally measure using fixed time point assay, curve is fitted with Michaelis Menten equation to a  $R^2$  of 0.97. Panel (B) is the standard curve of fluorescence signal versus concentration of product. (C) Dose response curve of substrate analog U44069 acting on human L-PGDS protein, the increment in protein stability is ligand concentration dependent as represented in the dose response curve. Results are representative of three independent experiments and values indicate means  $\pm$  s.d. of one experiment with three measurement taken. (D) APO crystal structure, 2Fo-Fc density map of ligand observed inside the binding groove near E-F and G-H loop is modeled with truncated PEG MME2000 found in the reservoir.
