# Supplementary material
Source: PubMed Central journal article supplement (PMC3646464)
Supplement: supp_M035410_jlr.M035410-2.pdf [file supp_M035410_jlr.M035410-2.pdf]

**Structural and dynamic insight into substrate binding and catalysis of Human Lipocalin  
Prostaglandin D Synthase  
Lim et al**

**Table S1:** Peak count for NMR amino acid assignment

|                                                      |                              |                     |                              |                              |
|------------------------------------------------------|------------------------------|---------------------|------------------------------|------------------------------|
| <b>Total no. of residues</b>                         | 176                          |                     |                              |                              |
| <b>Not observable residues</b>                       | 8 (Pro) ; 6 (His)            |                     |                              |                              |
| <b>Residues with two amide</b>                       | 4 (Asn) ; 12 (Gln) ; 8 (Arg) |                     |                              |                              |
| <b>Observable residues</b>                           | 210                          |                     |                              |                              |
| <b>Peak count for 2D <sup>15</sup>N-HSQC spectra</b> |                              |                     |                              |                              |
|                                                      | Yellow fraction              | Colourless fraction | Middle (colourless) fraction | Middle fraction added U46619 |
| <b>Total peaks observed</b>                          | 113 (53.8)                   | 200 (95)            | 154 (73.3)                   | 196 (93.6)                   |
| <b>Assignment</b>                                    |                              |                     |                              |                              |
| <b>Total residues cross peaks can be observed</b>    | 162                          |                     |                              |                              |
| <b>Total cross peaks observed in TROSY-HSQC</b>      | 145 (89.5)                   |                     |                              |                              |
| <b>Total assigned peaks</b>                          | 121 (74.7)                   |                     |                              |                              |

\*value in parentheses indicate percentage
