# Supplementary material
Source: PubMed Central journal article supplement (PMC3646464)
Supplement: supp_M035410_jlr.M035410-5.pdf [file supp_M035410_jlr.M035410-5.pdf]

**Structural and dynamic insight into substrate binding and catalysis of Human Lipocalin  
Prostaglandin D Synthase  
Lim et al**

**Table S2:** Line width (full width at half maximum) of selected resonance peaks showed that increased in intensities is accompanied by line width reduction in the presence of either substrate analog (SA) or product analog (PA).

| Residues                            | $^1\text{H}$ $\Delta\text{ppm}$ | $^{15}\text{N}$ $\Delta\text{ppm}$ | $^1\text{H}$ $\Delta\text{ppm}$ | $^{15}\text{N}$ $\Delta\text{ppm}$ |
|-------------------------------------|---------------------------------|------------------------------------|---------------------------------|------------------------------------|
|                                     | Native                          |                                    | SA                              |                                    |
| Intensities increased more than 50% |                                 |                                    |                                 |                                    |
| T73                                 | 0.055                           | 0.432                              | 0.048                           | 0.358                              |
| G140                                | 0.044                           | 0.432                              | 0.036                           | 0.377                              |
| Intensities increased less than 50% |                                 |                                    |                                 |                                    |
| A61                                 | 0.036                           | 0.314                              | 0.037                           | 0.296                              |
| F163                                | 0.036                           | 0.278                              | 0.037                           | 0.248                              |
|                                     | Native                          |                                    | PA                              |                                    |
| Intensities increased more than 50% |                                 |                                    |                                 |                                    |
| E90                                 | 0.056                           | 0.673                              | 0.034                           | 0.261                              |
| L131                                | 0.072                           | 0.63                               | 0.052                           | 0.347                              |
| Intensities increased less than 50% |                                 |                                    |                                 |                                    |
| N87                                 | 0.031                           | 0.229                              | 0.033                           | 0.237                              |
| T173                                | 0.03                            | 0.18                               | 0.035                           | 0.201                              |
