# Supplementary material
Source: PubMed Central journal article supplement (PMC3646464)

Structural and dynamic insight into substrate binding and catalysis of Human Lipocalin Prostaglandin D Synthase  
Lim et al

Figure S4

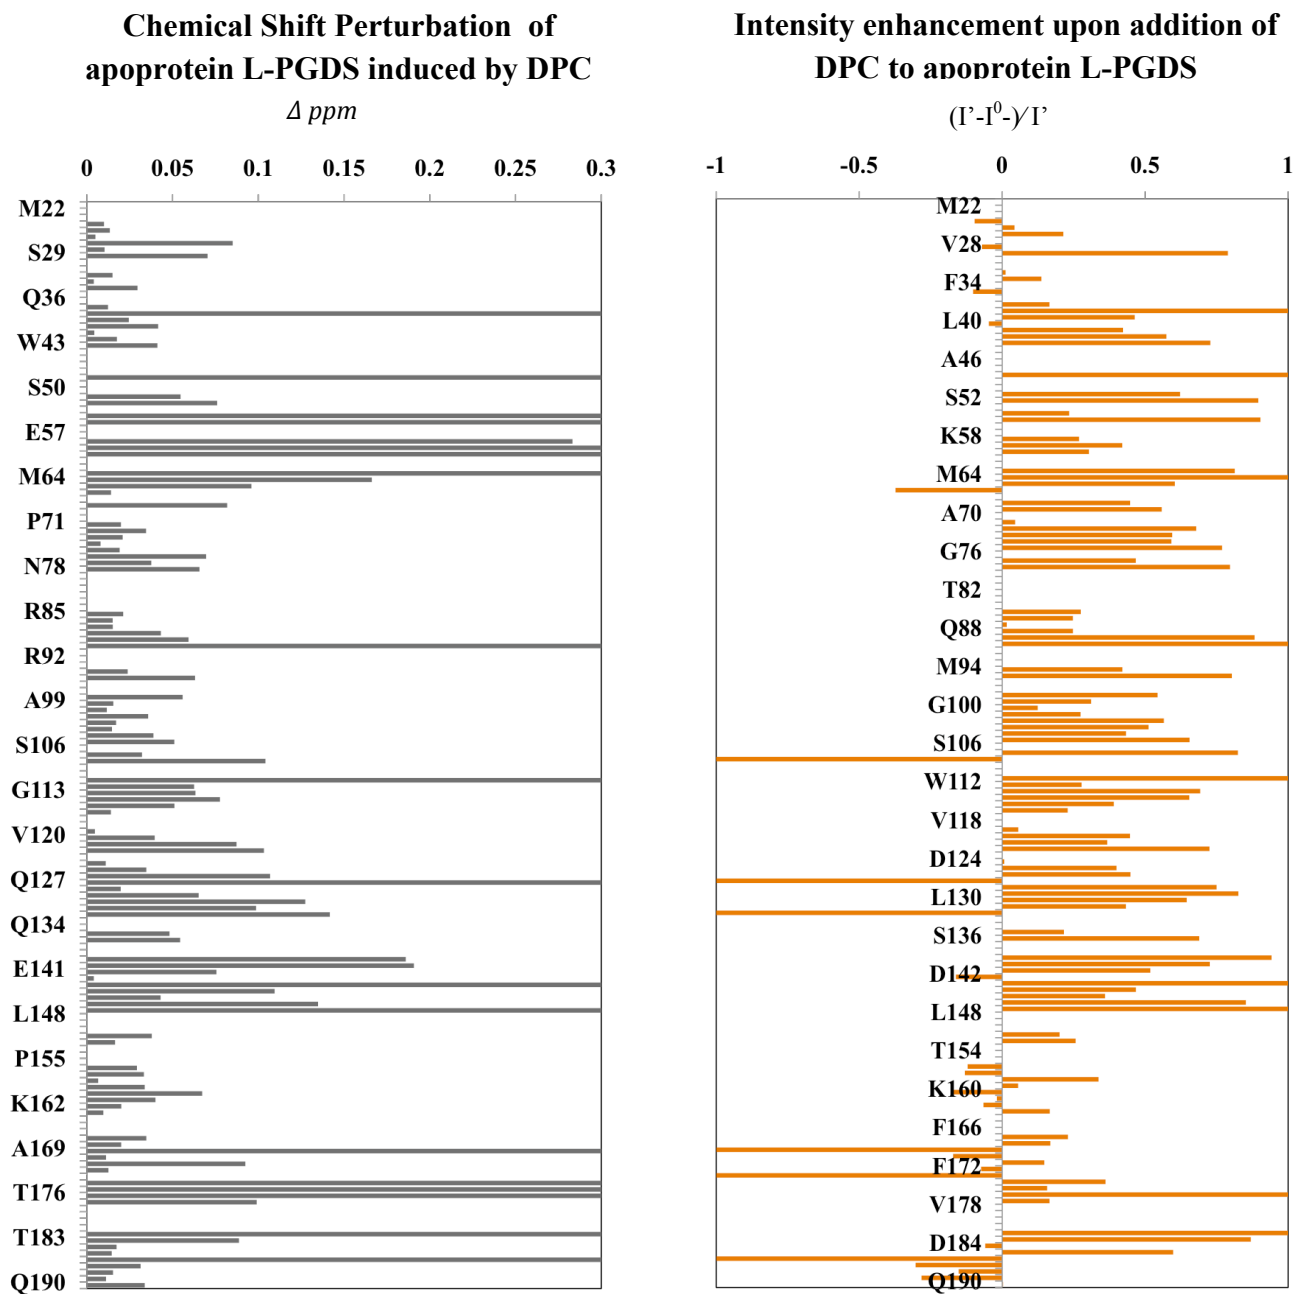

Supplement: supp_M035410_jlr.M035410-6.pdf [file supp_M035410_jlr.M035410-6.pdf]
